# Supplementary material
Source: PubMed Central journal article supplement (PMC7203991)
Supplement: ao0c00265_si_001.pdf [file ao0c00265_si_001.pdf]

**Donor-Pyrene-Acceptor Distance-Dependent Intramolecular Charge-Transfer Process:  
A State-Specific Solvation Preferred to the Linear-Response Approach**

Dipanwita Jana<sup>§</sup>, Sankar Jana<sup>\*,†</sup>

<sup>§</sup> Bishnupada Sarkar College of Education, Gourhati, Arambagh, Hooghly, West Bengal  
712613, India.

<sup>†</sup> School of Biology, Biomedical Science Research Complex, University of St Andrews,  
North Haugh, St Andrews, Fife, KY16 9ST, United Kingdom.

Telephone: +44 (0)1334 463401 Fax: +44 (0)1334 462595

\* Corresponding author, E-mail address: sankjana@gmail.com (S. Jana)

**Table S1:** B3LYP/SS-CPCM and LR-CPCM results for the DANP<sub>0</sub> molecule in n-hex, THF, and ACN solvents.

| ICT molecule                                                                                                 | Solvent | $\lambda_{\text{abs}}$ (nm)<br>(S <sub>0</sub> →S <sub>1</sub> ) | $f_{\text{osc}}$ | $\lambda_{\text{em}}$ (nm)<br>(S <sub>1</sub> →S <sub>0</sub> ) | $\Delta\nu = \nu_{\text{a}} - \nu_{\text{f}}$<br>(cm <sup>-1</sup> ) |
|--------------------------------------------------------------------------------------------------------------|---------|------------------------------------------------------------------|------------------|-----------------------------------------------------------------|----------------------------------------------------------------------|
| 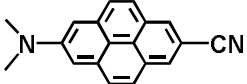<br><b>DANP<sub>0</sub></b> | n-hex   | 438 (410)                                                        | 0.036            | 494 (451)                                                       | 2588 (2217)                                                          |
|                                                                                                              | THF     | 461 (418)                                                        | 0.035            | 609 (464)                                                       | 5272 (2372)                                                          |
|                                                                                                              | ACN     | 464 (421)                                                        | 0.033            | 663 (469)                                                       | 6469 (2431)                                                          |

The values within parenthesis represent the B3LYP/LR-CPCM results

**Table S2:** The dipole moments of different ground- and excited-state structures in different solvents.

| <b>Solvent</b>          | <b>Molecules</b>  | <b>Step1</b> | <b>Step3</b> | <b>Step4</b> | <b>Step6</b> | <b>Step7</b> |
|-------------------------|-------------------|--------------|--------------|--------------|--------------|--------------|
| <b>vacuo</b>            | DANP <sub>0</sub> | 8.68         | 8.68         | 9.05         | -            | -            |
|                         | DANP <sub>1</sub> | 9.30         | 9.30         | 9.79         |              |              |
|                         | DANP <sub>2</sub> | 9.77         | 9.77         | 10.38        |              |              |
|                         | DANP <sub>3</sub> | 10.18        | 10.18        | 12.04        |              |              |
| <b>n-hex</b>            | DANP <sub>0</sub> | 9.63         | 15.12        | 10.12        | 15.59        | 10.11        |
|                         | DANP <sub>1</sub> | 10.16        | 15.39        | 10.80        | 15.64        | 10.79        |
|                         | DANP <sub>2</sub> | 10.61        | 16.04        | 11.44        | 16.12        | 11.43        |
|                         | DANP <sub>3</sub> | 11.05        | 21.61        | 13.75        | 25.18        | 13.74        |
| <b>DOX</b>              | DANP <sub>0</sub> | 9.81         | 15.49        | 10.33        | 16.14        | 10.42        |
|                         | DANP <sub>1</sub> | 10.33        | 15.72        | 10.99        | 16.13        | 11.07        |
|                         | DANP <sub>2</sub> | 10.77        | 16.36        | 11.66        | 16.62        | 11.73        |
|                         | DANP <sub>3</sub> | 11.20        | 25.09        | 14.11        | 26.33        | 14.30        |
| <b>CHCl<sub>3</sub></b> | DANP <sub>0</sub> | 10.46        | 16.41        | 11.06        | 18.12        | 11.77        |
|                         | DANP <sub>1</sub> | 10.88        | 16.53        | 11.65        | 17.90        | 12.26        |
|                         | DANP <sub>2</sub> | 11.30        | 17.10        | 14.34        | 29.05        | 15.90        |
|                         | DANP <sub>3</sub> | 11.71        | 27.63        | 15.44        | 30.57        | 17.03        |
| <b>THF</b>              | DANP <sub>0</sub> | 10.73        | 16.68        | 11.34        | 18.88        | 12.38        |
|                         | DANP <sub>1</sub> | 11.07        | 16.70        | 11.89        | 18.60        | 12.80        |
|                         | DANP <sub>2</sub> | 11.48        | 17.23        | 14.80        | 30.35        | 17.13        |
|                         | DANP <sub>3</sub> | 11.88        | 26.29        | 15.97        | 32.19        | 18.39        |
| <b>ACN</b>              | DANP <sub>0</sub> | 11.07        | 16.96        | 11.75        | 20.04        | 13.36        |
|                         | DANP <sub>1</sub> | 11.34        | 16.93        | 12.24        | 19.71        | 13.67        |
|                         | DANP <sub>2</sub> | 11.73        | 17.40        | 15.53        | 32.17        | 19.11        |
|                         | DANP <sub>3</sub> | 12.14        | 23.38        | 16.82        | 34.56        | 20.64        |
| <b>BuOH</b>             | DANP <sub>0</sub> | 10.98        | 16.99        | 11.61        | 19.71        | 13.00        |
|                         | DANP <sub>1</sub> | 11.27        | 16.96        | 12.14        | 19.38        | 13.35        |
|                         | DANP <sub>2</sub> | 11.67        | 17.45        | 15.31        | 31.66        | 18.37        |
|                         | DANP <sub>3</sub> | 12.08        | 26.49        | 16.57        | 33.89        | 19.80        |
| <b>EtOH</b>             | DANP <sub>0</sub> | 11.03        | 16.96        | 11.68        | 19.90        | 13.22        |
|                         | DANP <sub>1</sub> | 11.31        | 16.93        | 12.19        | 19.57        | 13.55        |
|                         | DANP <sub>2</sub> | 11.71        | 17.41        | 15.44        | 31.96        | 18.82        |
|                         | DANP <sub>3</sub> | 12.11        | 24.37        | 16.72        | 34.28        | 20.31        |
| <b>MeOH</b>             | DANP <sub>0</sub> | 11.06        | 16.91        | 11.72        | 20.01        | 13.37        |
|                         | DANP <sub>1</sub> | 11.33        | 16.88        | 12.23        | 19.68        | 13.68        |
|                         | DANP <sub>2</sub> | 11.73        | 17.35        | 15.51        | 32.12        | 19.13        |
|                         | DANP <sub>3</sub> | 12.14        | 22.61        | 16.80        | 34.50        | 20.66        |
| <b>H<sub>2</sub>O</b>   | DANP <sub>0</sub> | 11.12        | 17.0         | 11.81        | 20.22        | 13.52        |
|                         | DANP <sub>1</sub> | 11.38        | 16.96        | 12.29        | 19.89        | 13.81        |
|                         | DANP <sub>2</sub> | 11.77        | 17.42        | 15.64        | 32.43        | 19.43        |
|                         | DANP <sub>3</sub> | 12.18        | 22.89        | 16.96        | 34.91        | 21.01        |

**Table S3:** Calculated spectroscopic parameters for supporting molecules in n-hex and ACN solvents.

| ICT molecules                                                                                   | Solvent | $\lambda_{\text{abs}}$ (nm)<br>( $S_0 \rightarrow S_1$ ) | $f_{\text{osc}}$ | $\lambda_{\text{em}}$ (nm)<br>( $S_1 \rightarrow S_0$ ) | $\Delta\nu = \nu_a - \nu_f$<br>( $\text{cm}^{-1}$ ) |
|-------------------------------------------------------------------------------------------------|---------|----------------------------------------------------------|------------------|---------------------------------------------------------|-----------------------------------------------------|
| 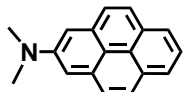<br><b>DAP</b> | n-hex   | 355                                                      | 0.065            | 385                                                     | 2195                                                |
|                                                                                                 | ACN     | 365                                                      | 0.063            | 439                                                     | 4618                                                |
| <br><b>NP3</b> | n-hex   | 344                                                      | 2.258            | 415                                                     | 4973                                                |
|                                                                                                 | ACN     | 348                                                      | 2.289            | 440                                                     | 6008                                                |

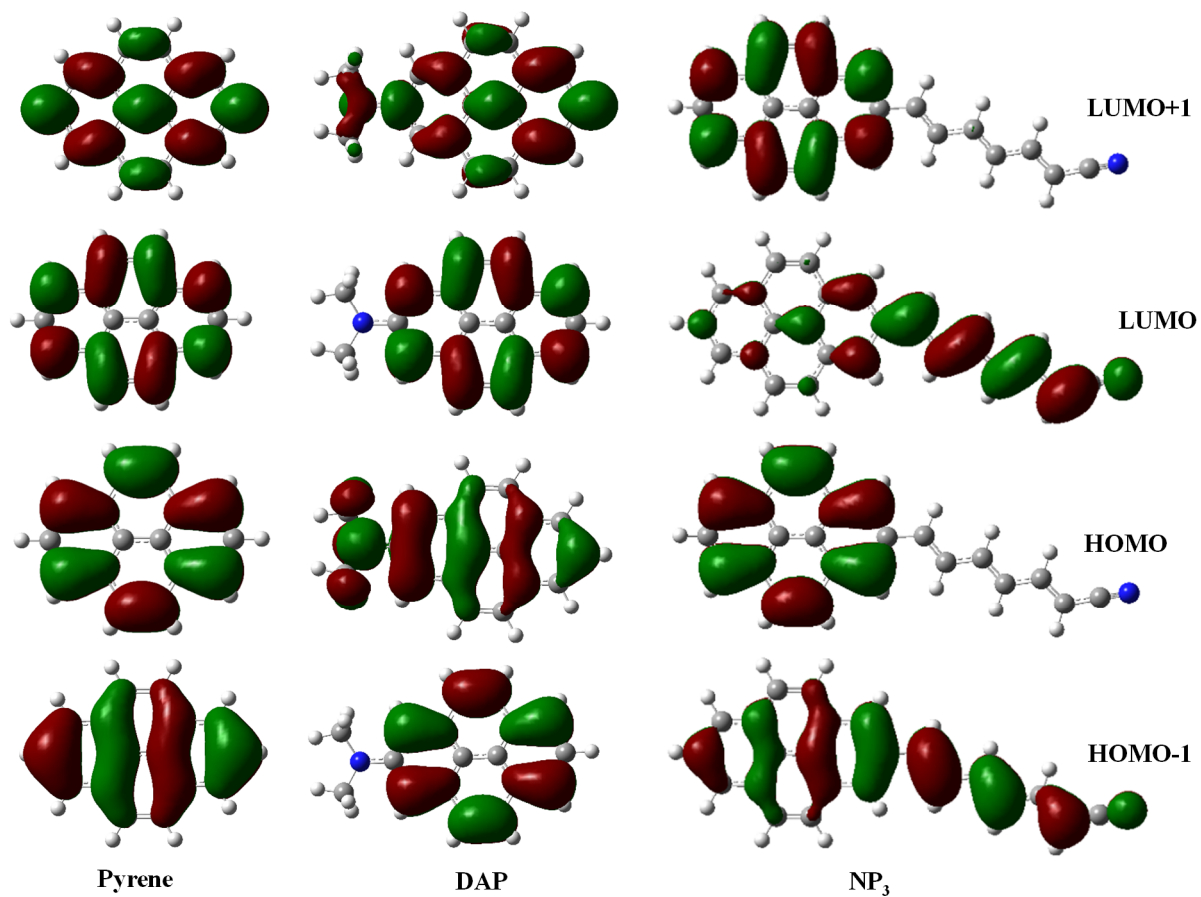

**Figure S1.** MO diagrams of Pyrene, DAP, and NP<sub>3</sub> molecules in ACN solvent. MO diagrams generated from the optimized geometry using the CAM-B3LYP functional 6-311G++(d,p) basis set considering the CPCM solvation model.
